# Supplementary material for: Aerosol assisted synthesis of hierarchical tin–carbon composites and their application as lithium battery anode materials
Source: Royal Society of Chemistry journal article supplement (doi:10.1039/c3ta11802a), 2013-01-01
Supplement: c3ta11802a.pdf [file c3ta11802a.pdf]

## Aerosol Assisted Synthesis of Hierarchical Tin-Carbon Composites and their Application as Lithium Battery Anode Materials

Juchen Guo<sup>§\*</sup>, Zichao Yang and Lynden A. Archer<sup>\*</sup>

School of Chemical and Biomolecular Engineering, Cornell University, Ithaca, NY 14853, USA  
laa25@cornell.edu, jguo@engr.ucr.edu

<sup>§</sup>Current Address: Department of Chemical and Environmental Engineering, University of California at Riverside, Riverside, CA 92521, USA

† Electronic supplementary information (ESI) available.

### Supporting Information

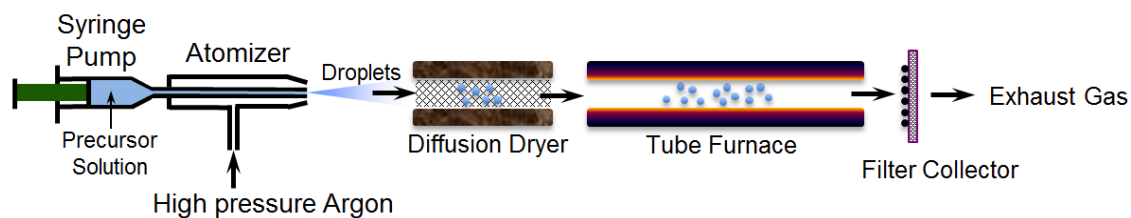

**Figure S1.** Schematic of apparatus of the aerosol spray pyrolysis synthesis of Sn-C particles.

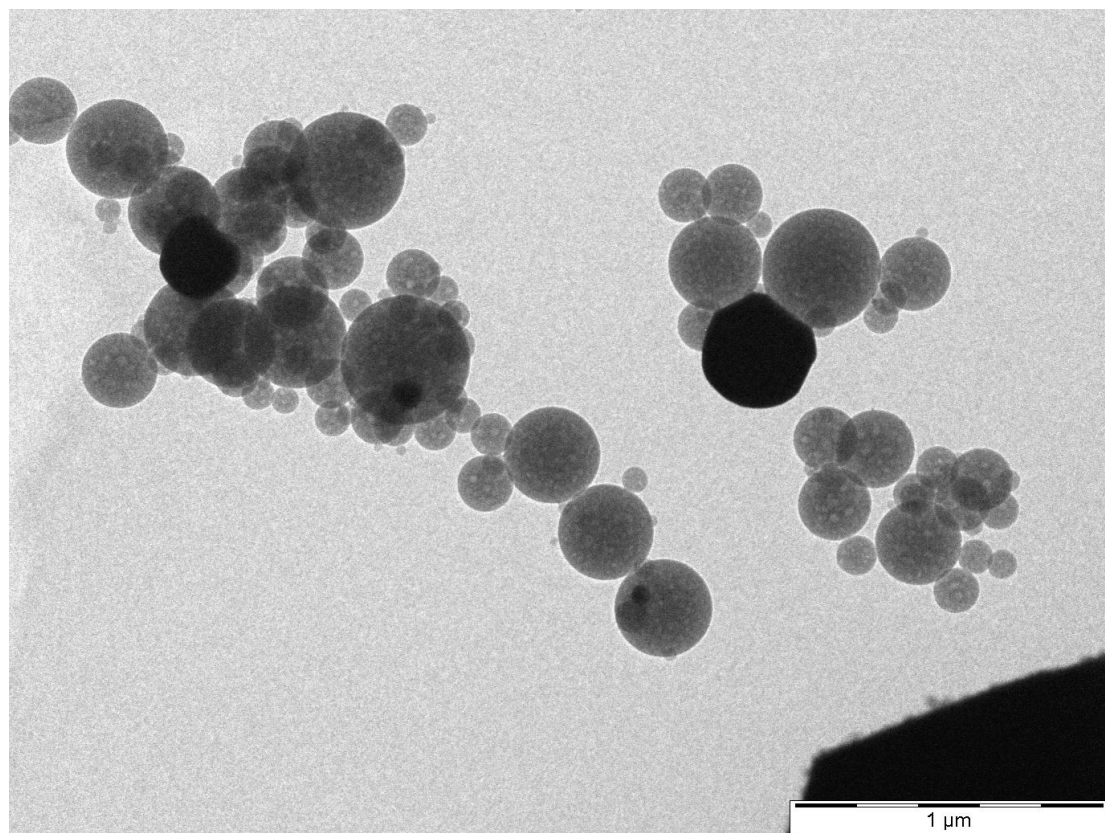

**Figure S2.** TEM image of Sn-C particles after 1 hour heat treatment at 700°C in an Argon atmosphere.

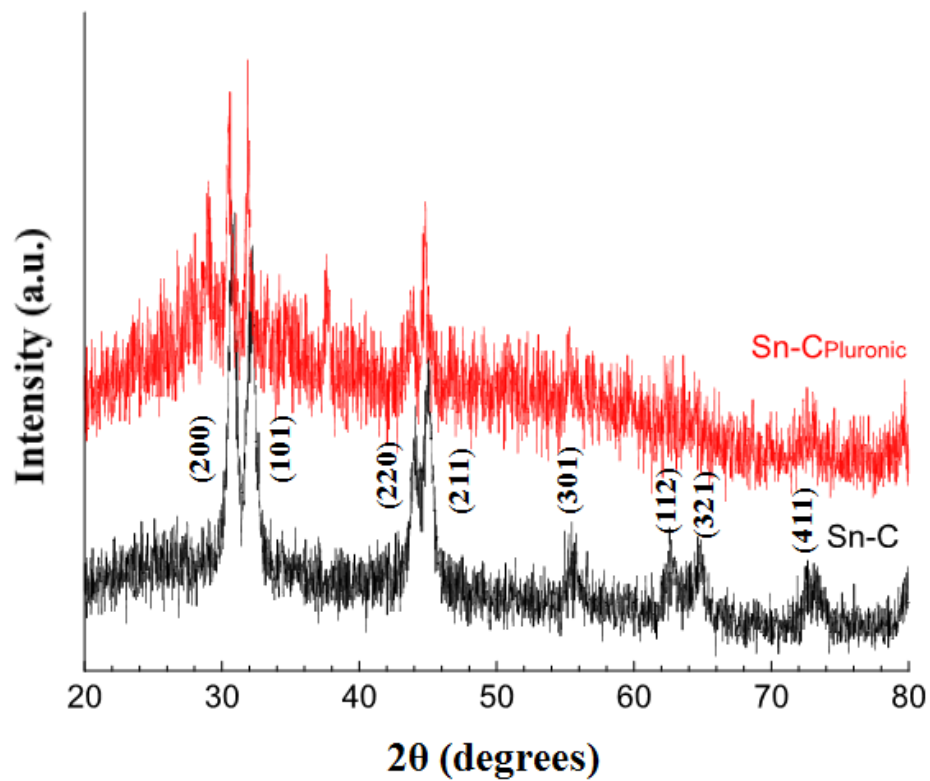

**Figure S3.** X-ray powder diffraction patterns for Sn-C and Sn-C<sub>Pluronic</sub> particles.

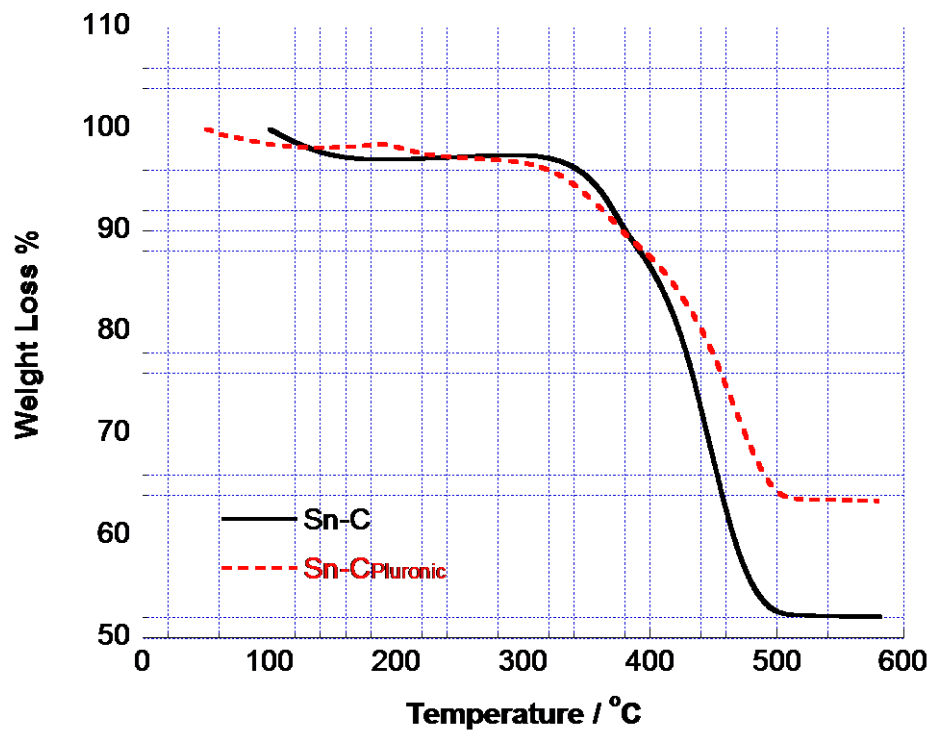

**Figure S4.** TGA of the Sn-C and Sn-C<sub>Pluronic</sub> composites.
